# Supplementary material for: Synthesis of sunflower-like gold nanostructures and their application in electrochemical immunoassays using the nanogold-triggered hydrogen evolution reaction
Source: Royal Society of Chemistry journal article supplement (doi:10.1039/c5ay03174e), 2016-01-01
Supplement: c5ay03174e1.pdf [file c5ay03174e1.pdf]

## **Electronic Supplementary Information**

### **Synthesis of sunflower-like gold nanostructure and its application in the electrochemical immunoassay using nanogold-triggered hydrogen evolution reaction**

Xiaohong Fu,\* Kun Xu and Xueru Feng

*Department of Chemistry and Bioscience, Chengdu Normal University, Chengdu 611130, P.R.  
China*

E-mail: xiaohong.fuzq@gmail.com (X. Fu)

## 1 EXPERIMENTAL SECTION

2 **Materials.** Monoclonal mouse anti-human neuron-specific enolase (NSE) antibody  
3 (designated as mAb), polyclonal rabbit anti-human NSE antibody (designated as pAb) and NSE  
4 standards with various concentrations were purchased from Beijing Biosynthesis Biotechnol. Co.,  
5 Ltd (Beijing, China). Chitosan, ascorbic acid, bovine serum albumin (BSA),  $\beta$ -Cyclodextrin (CD),  
6 hydrogen tetrachloroaurate (III) tetrahydrate ( $\text{HAuCl}_4 \cdot 4\text{H}_2\text{O}$ ), poly(vinyl pyrrolidone) (PVP) and  
7 sodium dodecyl sulfate (SDS) were purchased from Sinopharm Chem. Re. Co. Ltd. (Shanghai,  
8 China). All other reagents were of analytical grade and were used without further purification.  
9 All solutions were prepared with deionized water obtained from a Milli-Q water purifying system  
10 ( $18.2 \text{ M}\Omega \text{ cm}^{-1}$ , Milli-Q, Millipore). Phosphate-buffered saline (PBS) solution with various pH  
11 values were prepared by mixing 0.1 M  $\text{NaH}_2\text{PO}_4$  and 0.1 M  $\text{Na}_2\text{HPO}_4$ , and 0.1 M KCl was used  
12 as the supporting electrolyte. Binding and washing buffer was 0.1 M PBS (pH 7.4) containing  
13 0.05% (w/v) Tween 20. The blocking buffer was 0.1 M PBS (pH 7.4) containing 2.5 wt% BSA.

14 **Synthesis of Sunflower-Like Gold Nanostructures (AuNFs).** Prior to synthesis, all glassware  
15 used in the synthesis was cleaned in a bath of freshly prepared 3 : 1 (v/v)  $\text{HNO}_3$ -HCl and rinsed  
16 thoroughly prior to use. Sunflower-like gold nanostructures (designated as AuNFs) with an  
17 average size of 50 nm in diameter along its horizontal or longitudinal axis were synthesized in  
18 aqueous solution with poly(vinyl pyrrolidone) (PVP)-sodium dodecyl sulfate (SDS) aggregations  
19 similar to the literatures [Y. Ren, C. Xu, M. Wu, M. Niu, Y. Fang, *Colloids Surf. A* **2011**, 380,  
20 222.]. Briefly, 50-mg PVP and 35-mg SDS were added into 10-mL distilled water in a beaker  
21 under vigorous stirring in sequence. Afterwards, the mixture was heated up to 40 °C and  
22 continuously stirred for 60 min. 50  $\mu\text{L}$  of 10 mM  $\text{HAuCl}_4$  aqueous solution was rapidly injected  
23 to the mixture. Following that, 1.0 mL of 50 mM NaOH solution was slowly dropped to the  
24 resulting suspension under the same conditions (*Note*: The color of the mixture changed from  
25 pale white to dark blue during this process). After that, AuSFs were collected by centrifugation  
26 (15 min at 10,000 g).

1     **Bioconjugation of pAb Antibody with AuSFs (AuNF-pAb).** AuNF colloids were washed  
2 and purified by centrifugation to remove the impurities including PVP and SDS. The purified  
3 AuNF colloids were dissolved in 1.25 mL of distilled water ( $C_{[Au]} \approx 6$  mM), and were conjugated  
4 with pAb antibody. The reaction is based on the interaction between  $-NH_2$ /or  $-SH$  groups on the  
5 pAb and AuNF. Briefly, 1.25 mL of AuNF was initially adjusted to pH 9.0-9.5 using  $Na_2CO_3$ ,  
6 and then 250  $\mu$ L of pAb ( $0.5$  mg  $mL^{-1}$ ) was added into the AuNF. The mixture was gently shaken  
7 for 5 min, and transferred to the refrigerator for an overnight reaction. The suspension was  
8 centrifuged at 4 °C for 30 min at 13,000 rpm. The purified AuNF-pAb conjugates ( $C_{[Au]} \approx 7.5$   
9 mM) were stored in 1.0 mL of pH 7.4 PBS containing 1.0 wt % BSA at 4 °C for further use.

10    **Preparation of Electrochemical Immunosensor.** A glassy carbon electrode (GCE) with 2  
11 mm in diameter (Electrode area: 3.14  $mm^2$ ) was polished with 0.3  $\mu$ m and 0.05  $\mu$ m alumina,  
12 followed by successive sonication in bi-distilled water and ethanol for 5 min and dried in air. The  
13 well-polished electrode was cycled in a 0.1 M  $H_2SO_4$  solution for 5 times in the potential range  
14 from 0 to 2 V. During this process, the anodization of the GCE surface resulted in a multilayer  
15 oxide film having  $-OH$  groups or  $-COOH$  groups [J. Tang, L. Hou, D. Tang, B. Zhang, J. Zhou  
16 and G. Chen, *Chem. Commun.* 2012, **48**, 8180]. Following that, 5  $\mu$ L of  $\beta$ -cyclodextrin (CD)  
17 aqueous solution ( $50$  mg  $mL^{-1}$ ) was cast onto the surface of the pretreated GCE and dried for  
18 about 2 h at room temperature (RT) to form a CD-modified GCE. After washing with distilled  
19 water, 10  $\mu$ L of mAb antibodies ( $1.0$  mg  $mL^{-1}$ ) was thrown on the modified electrode, and  
20 incubated for 4 h at RT. During this process, mAb antibodies were immobilized on the CD-  
21 modified GCE owing to the  $\beta$ -cyclodextrin capture [L. Zeng, Q. Li, D. Tang, G. Chen and M.  
22 Wei, *Electrochim. Acta* 2012, **68**, 158; K. Ikura, J. Fujimoto, K. Kubonishi, S. Natsuka, H.  
23 Hashimoto, T. Ito and K. Fujita, *Cytotechnology* 2002, **40**, 23]. Subsequently, the modified  
24 electrode was treated with a solution of 2.5 wt % BSA for 60 min at 37 °C to eliminate the  
25 nonspecific effect. Finally, the as-prepared mAb-CD-GCE was stored at 4 °C when not in use.

26    **Electrochemical Measurement.** All electrochemical measurements were carried out with a

1 CHI 660C Electrochemical Workstation (Shanghai, China) with a conventional three-electrode  
2 system using a modified GCE as working electrode, a platinum wire as auxiliary electrode, and a  
3 saturated calomel electrode (SCE) as reference electrode. Scheme 1 gives the electrochemical  
4 immuno-HER measurement protocol toward NSE. Initially, 10  $\mu\text{L}$  of NSE standards/or samples  
5 was dropped to the immunosensor, and incubated for 30 min at room temperature to form the  
6 antigen-antibody complex. After being washed with the washing buffer, 10  $\mu\text{L}$  of above-prepared  
7 AuNF-pAb was thrown on the immunosensor, and incubated for another 30 under the same  
8 conditions to construct a sandwiched immunocomplex. Following that, 250  $\mu\text{L}$  of 2 M HCl  
9 solution was added and a potential of +1.35 V was applied for 50 sec (electrochemical  
10 pretreatment). Thereafter, a potential of -1.0 V was applied for 50 sec in chronoamperometric  
11 mode. Under these conditions,  $\text{H}^+$  ions were reduced to  $\text{H}_2$  thanks to the catalytic effect of the  
12 gold nanoparticles [M. Maltez-de Costa, A. de la Escosura-Muniz and A. Merkoci, *Electrochem.*  
13 *Commun.*, 2010, **12**, 1501; M. Maltez-de Costa, A. de la Escosura-Muniz, C. Nogues, L.  
14 Barrios, E. Ibanez and A. Merkoci, *Small*, 2012, **8**, 3605;]. The value of the catalytic current  
15 registered at 10 sec was collected as the sensor signal, being this value proportional to the  
16 quantity of gold nanoparticles and, consequently, to the concentration of target NSE. All  
17 measurements were carried out at room temperature ( $25 \pm 1.0$   $^\circ\text{C}$ ). Analyses are always made in  
18 triplicate.

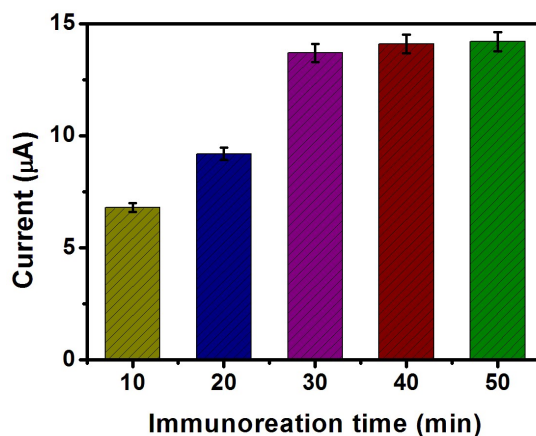

19

20 **Fig. S1.** Effect of immunoreaction time on the signal of AuSF-based immuno-HER assay by using 1.0 ng/mL

1 NSE as an example.

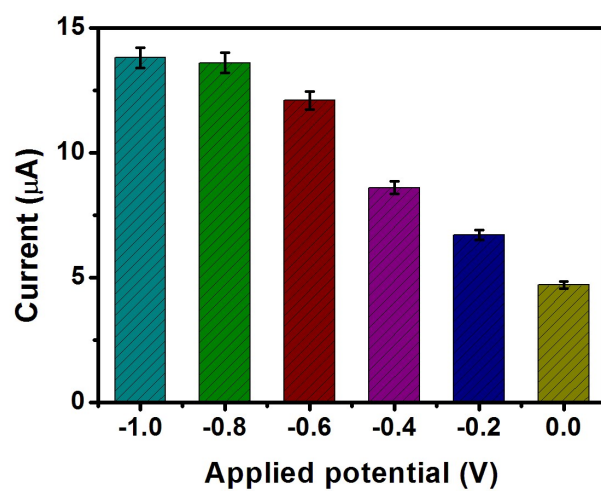

2

3 **Fig. S2.** Effect of the applied potential for HER reaction time on the signal of AuSF-based immuno-HER assay

4 by using 1.0 ng/mL NSE as an example.
